# Supplementary material
Source: PubMed Central journal article supplement (PMC374340)

**A.**

|        | Hours |     |     |     | Days |     |       |     |     |     |     |     |     |  |
|--------|-------|-----|-----|-----|------|-----|-------|-----|-----|-----|-----|-----|-----|--|
|        | 6     | 24  | 48  | 72  | 5    | 7   | 14    | 21  | 28  | 35  | 58  | 86  | 210 |  |
| PBMC   | 3/3   | 3/3 | 3/3 | 4/6 | 3/3  | 3/3 | 8/9   | 0/7 | 0/3 | 0/3 | 0/4 |     | 0/2 |  |
| Spleen | 3/3   | 3/3 | 4/5 | 5/6 | 2/3  | 1/3 | 10/13 | 1/4 | 0/4 | 0/3 | 0/4 |     | 0/2 |  |
| BM     | 0/3   | 1/3 | 1/3 | 1/6 | 0/3  | 0/3 | 1/3   | 1/4 | 0/4 |     | 0/4 |     | 0/2 |  |
| LN     | 0/3   | 0/3 | 0/3 | 0/3 | 0/3  | 0/3 | 0/3   | 0/4 |     |     |     |     | 0/2 |  |
| Lung   | 3/3   | 2/3 |     |     |      |     | 1/3   | 0/4 | 0/2 |     | 0/2 | 0/2 | 0/2 |  |
| Kidney | 3/3   | 0/3 |     |     |      |     | 1/3   | 0/4 | 0/2 |     | 0/2 | 0/2 | 0/2 |  |
| Liver  | 0/3   | 1/3 |     |     |      |     | 1/3   | 0/4 |     |     | 0/2 | 0/2 | 0/2 |  |
| Heart  | 0/3   | 0/3 |     |     |      |     | 1/3   | 0/4 | 0/2 |     | 0/2 | 0/1 | 0/2 |  |
| Gonads |       | 0/4 |     |     |      |     | 0/3   |     |     |     | 0/4 |     | 0/2 |  |
| Muscle | 0/3   | 0/3 |     |     |      |     | 0/3   | 0/4 | 0/2 |     | 0/2 | 0/2 |     |  |

**B.**

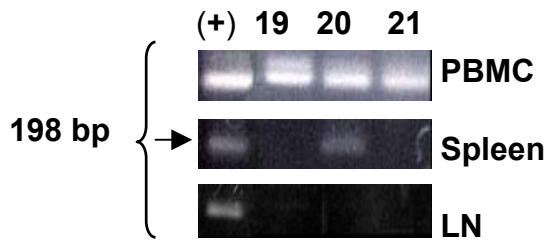

**C.**

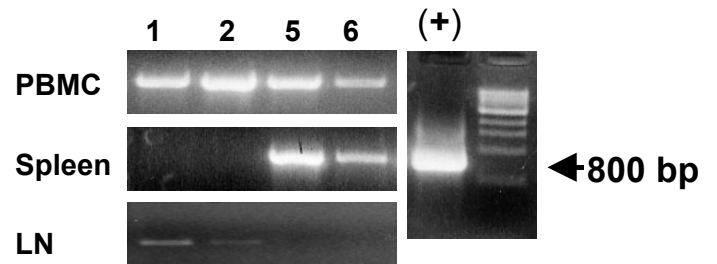

Supplement: pnas_101_11_3892__3.pdf [file pnas_101_11_3892__3.pdf]
